# Supplementary material for: Ferrous iron–activatable drug conjugate achieves potent MAPK blockade in KRAS-driven tumors
Source: PubMed Central journal article supplement — J Exp Med. 2022 Mar 9;219(4):e20210739. doi: 10.1084/jem.20210739 (PMC8916116; doi:10.1084/jem.20210739), 2022-03-09

*Supplementary Information for*

**Exploiting KRAS-driven Ferroaddiction in Cancer Through  
Ferrous Iron-Activatable Drug Conjugates (FeADC)**

**Table of Contents**

Scans of NMR, HMRS Spectra and LC/MS Chromatograms.....2

**<sup>1</sup>H, <sup>13</sup>C NMR, <sup>19</sup>F, LCMS and HRMS data for (1''R, 3''R) TRX-COBI**

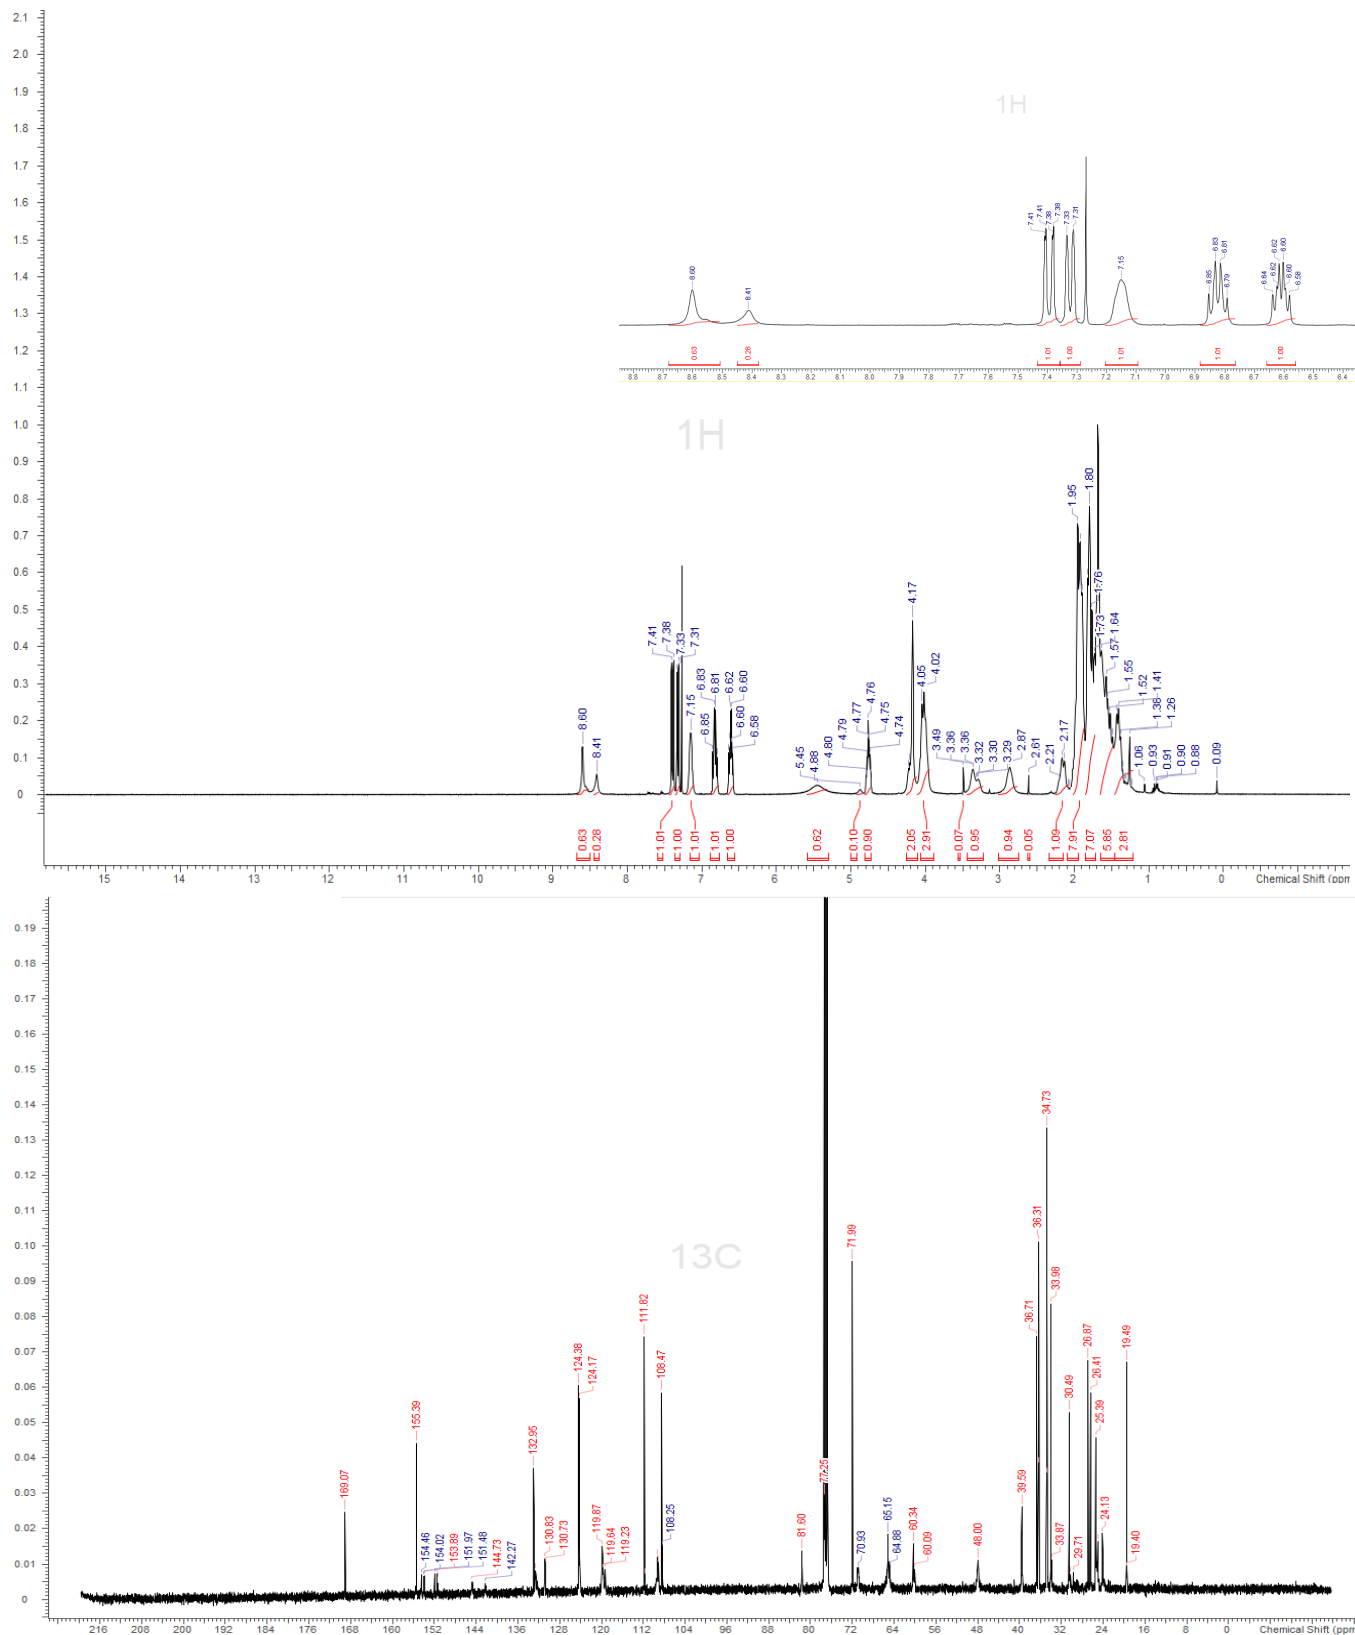

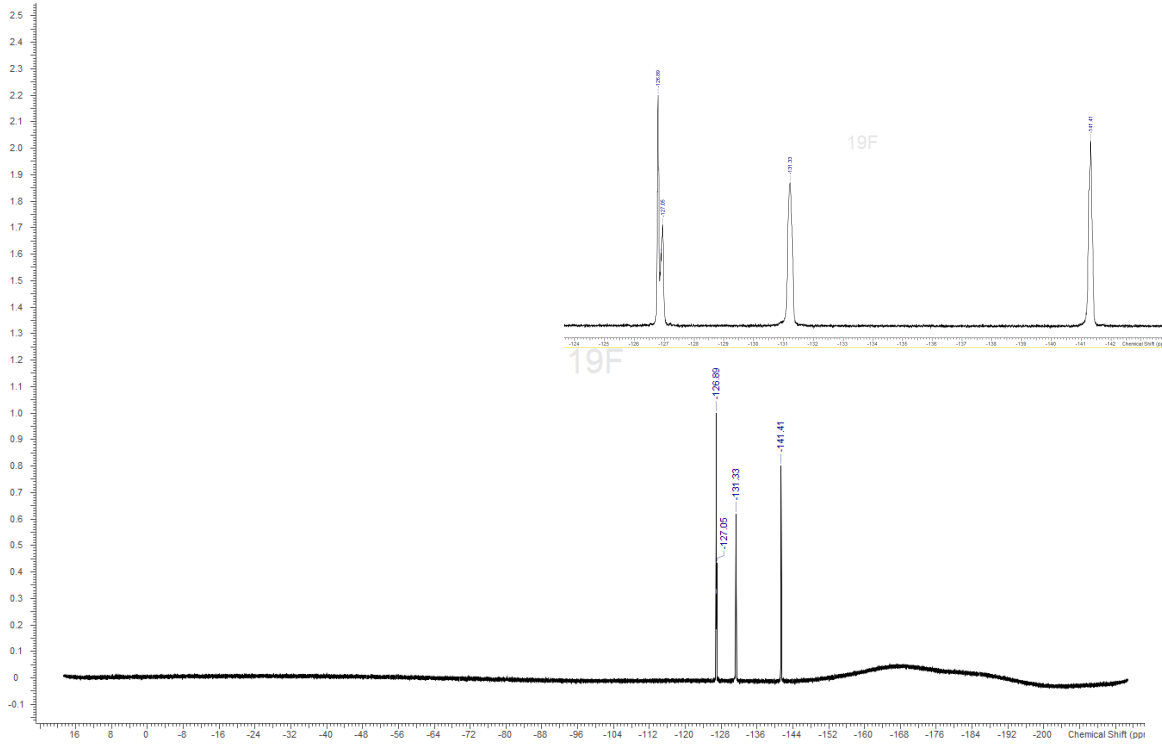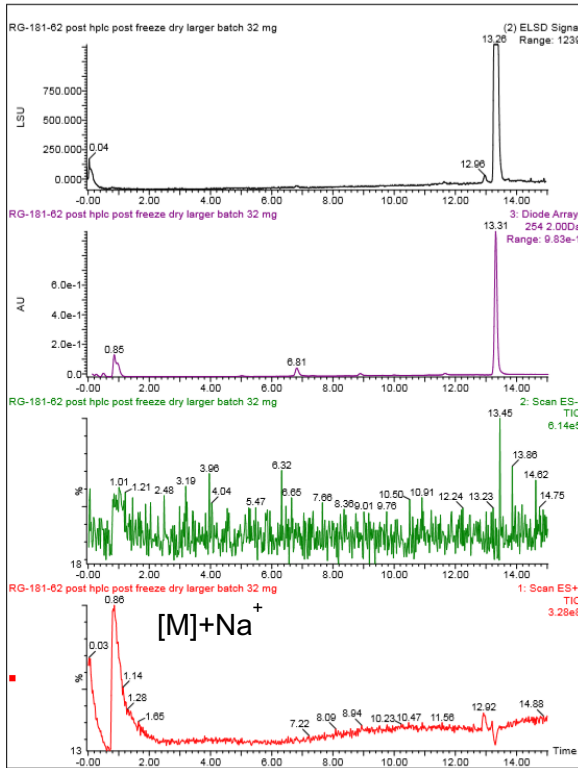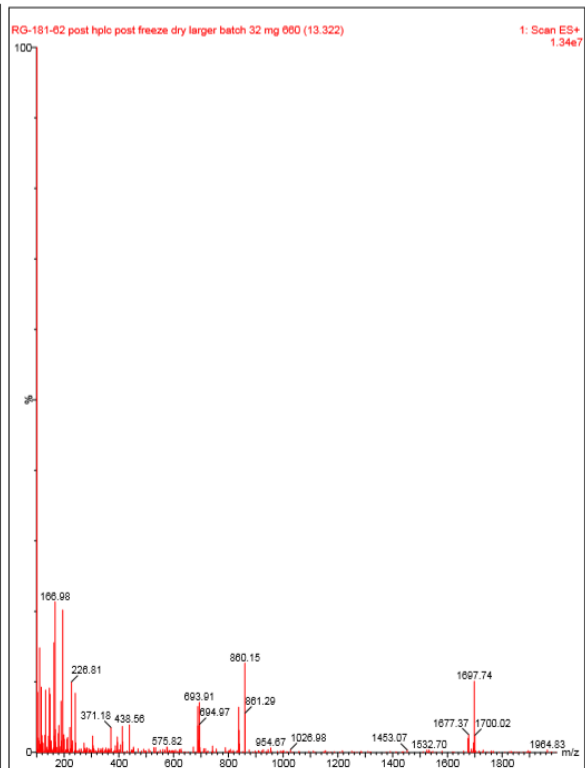

LFT19604 #1-57 RT: 0.01-0.99 AV: 57 NL: 2.33E5  
T: FTMS + p ESI Full ms [620.00-1200.00]

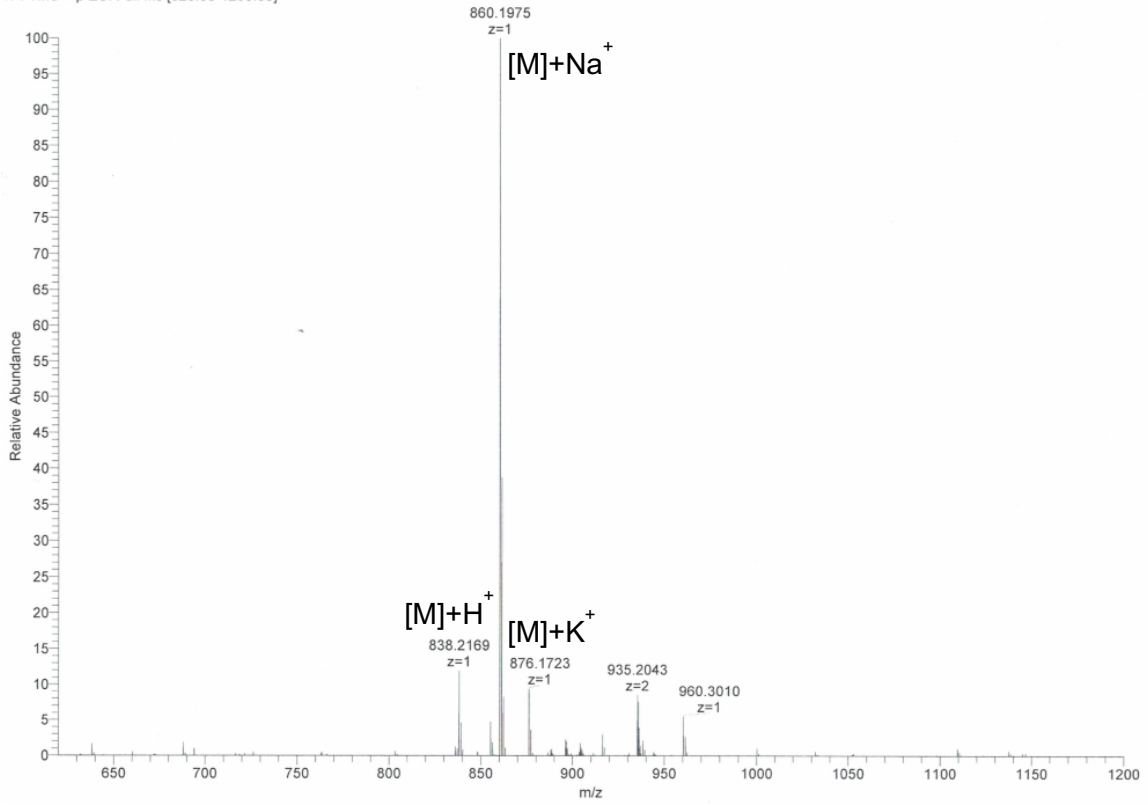

# $^1\text{H}$ , $^{13}\text{C}$ NMR, $^{19}\text{F}$ , LCMS, and HRMS data for (1''S, 3''S) TRX-COBI

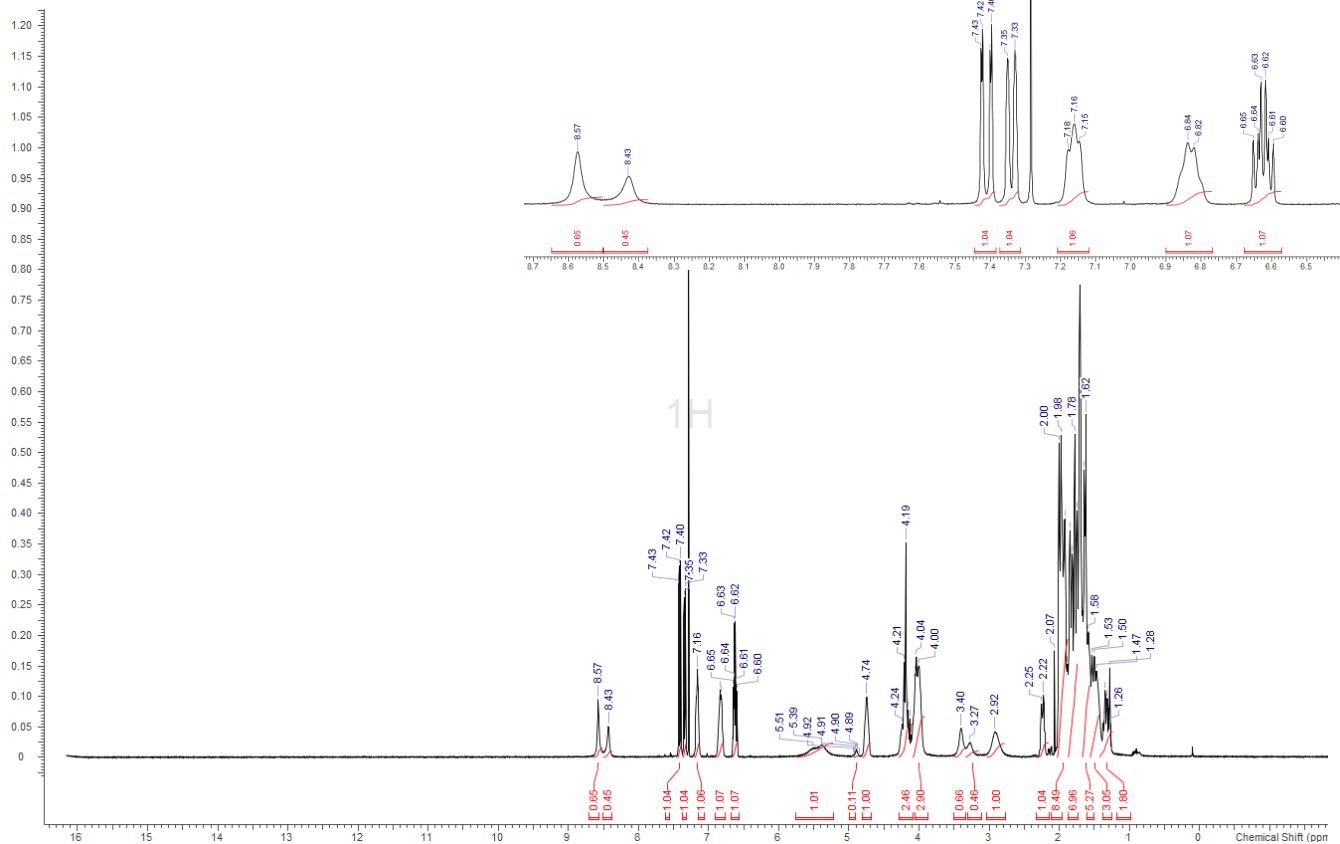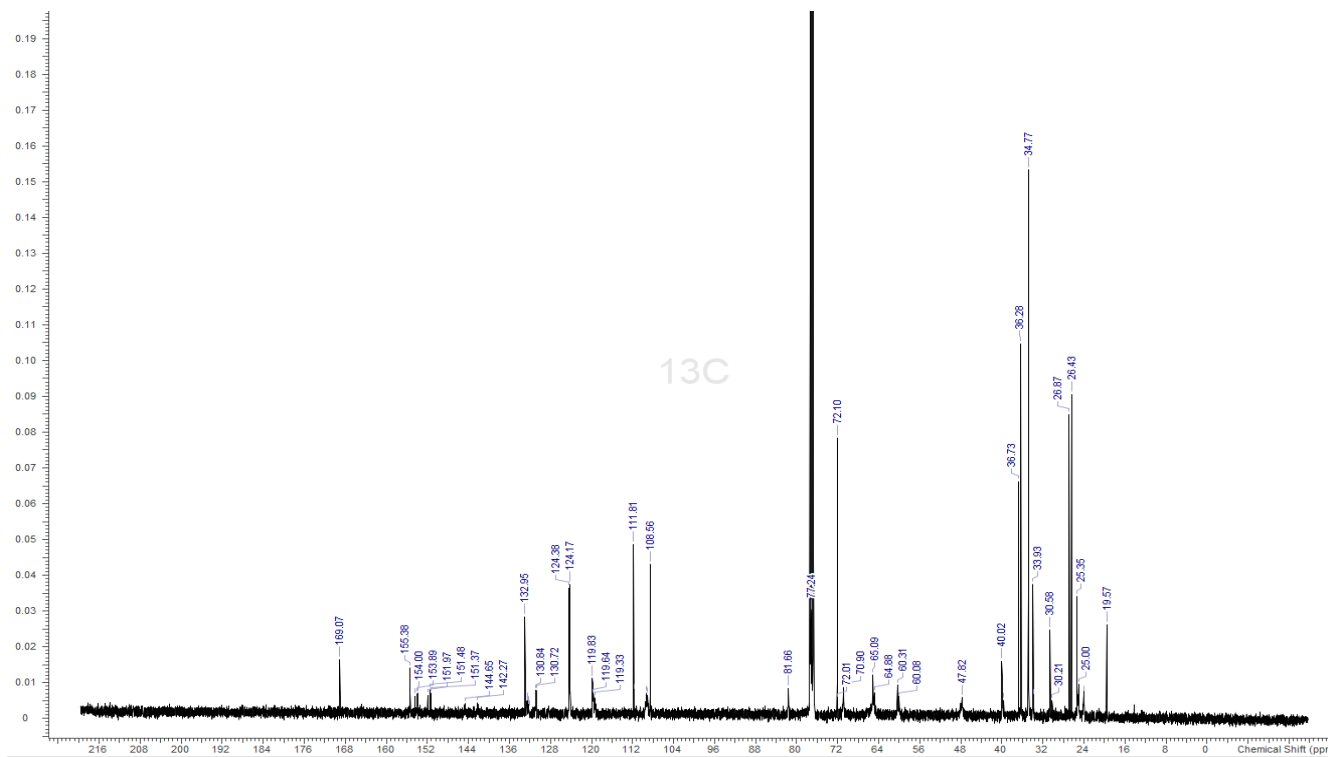

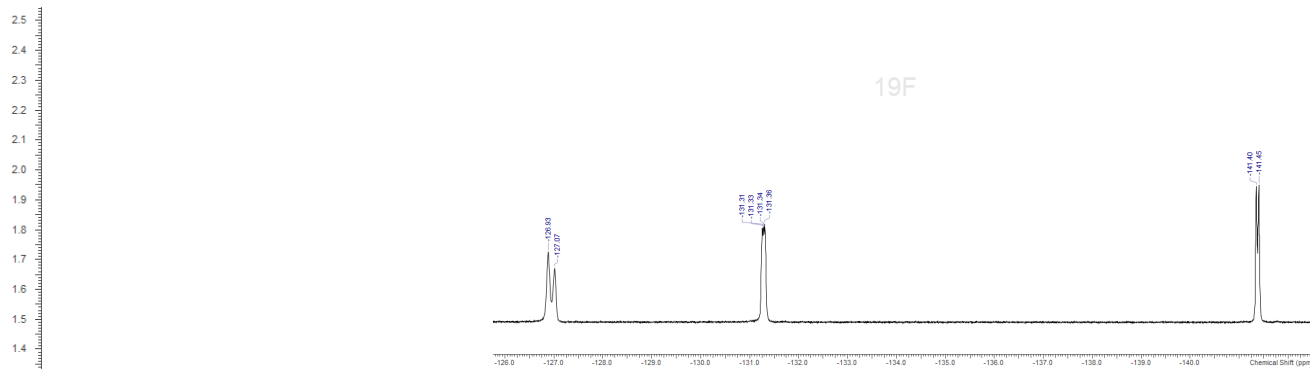

11

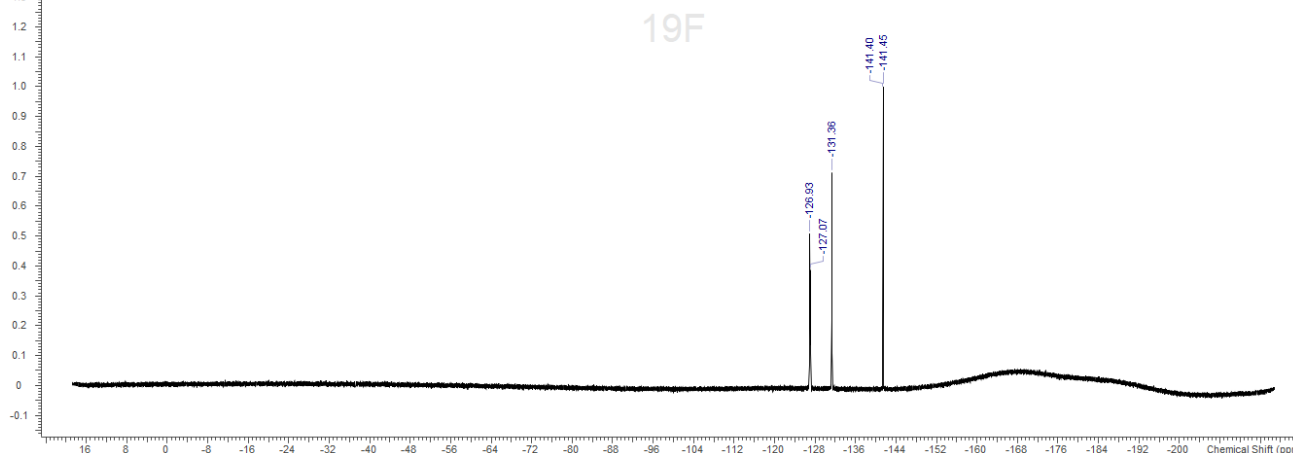

LFT19602 #1-53 RT: 0.01-1.00 AV: 53 NL: 1.66E5  
T: FTMS + p ESI Full ms [550.00-1100.00]

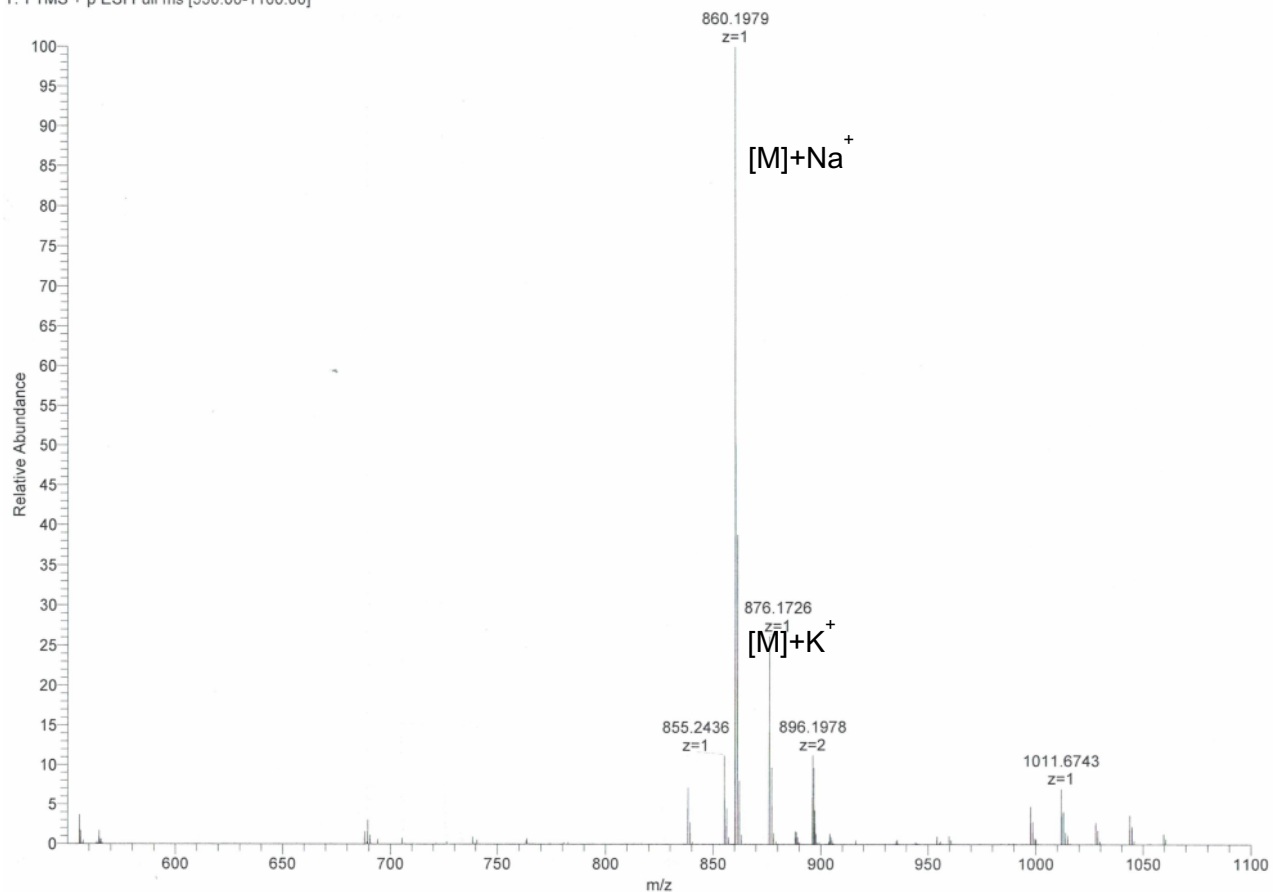

Supplement: JEM_20210739_DataS1.pdf [file JEM_20210739_DataS1.pdf]
